# Supplementary material for: Microplastics in the Olfactory Bulb of the Human Brain
Source: PubMed Central journal article supplement (PMC11406405; doi:10.1001/jamanetworkopen.2024.40018), 2024-09-16
Supplement: jamanetwopen-e2440018-s001.pdf [file jamanetwopen-e2440018-s001.pdf]

## Supplemental Online Content

Amato-Lourenço LF, Dantas KC, Júnior GR, et al. Microplastics in the olfactory bulb of the human brain. *JAMA Netw Open*. 2024;7(9):e2440018.  
doi:10.1001/jamanetworkopen.2024.40018

**eFigure.** Microphotographs and  $\mu$ FTIR Spectra of the Microplastics Found in the Digested Olfactory Bulb

This supplemental material has been provided by the authors to give readers additional information about their work.

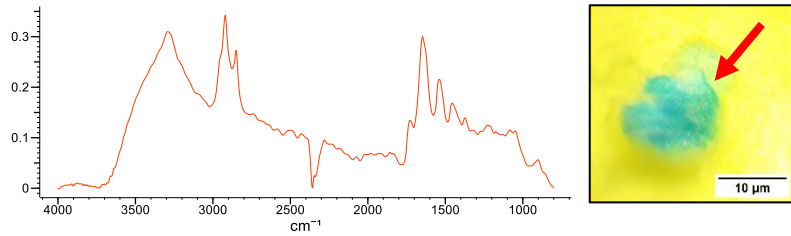

Polyamide – HQI: 78.9

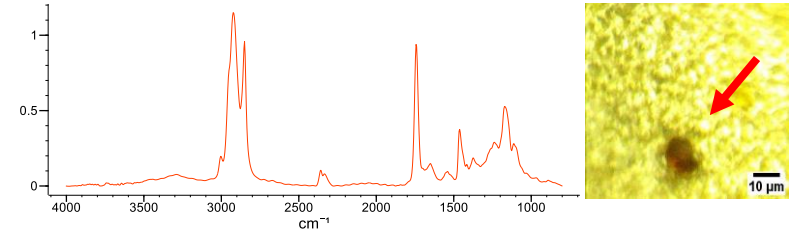

Polyethylene vinyl acetate – HQI: 82.2

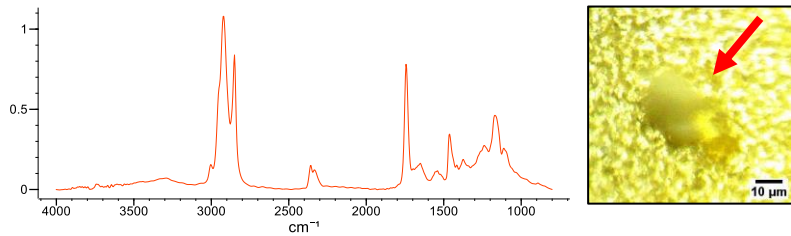

Polyethylene vinyl acetate – HQI: 84.1

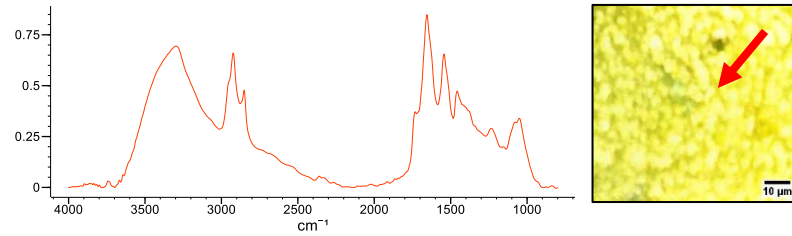

Wool + Polypropylene – HQI: 85.5

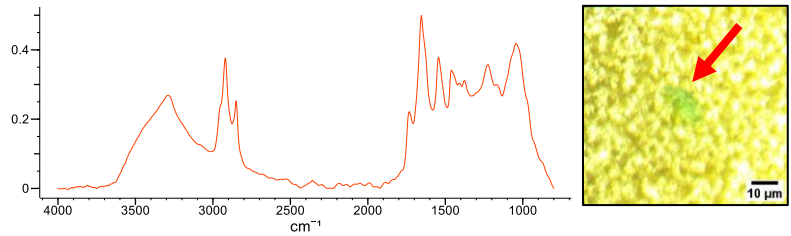

Polypropylene – HQI: 83.6

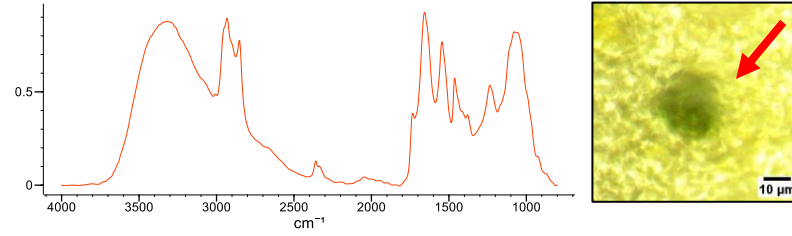

Polypropylene – HQI: 83.1

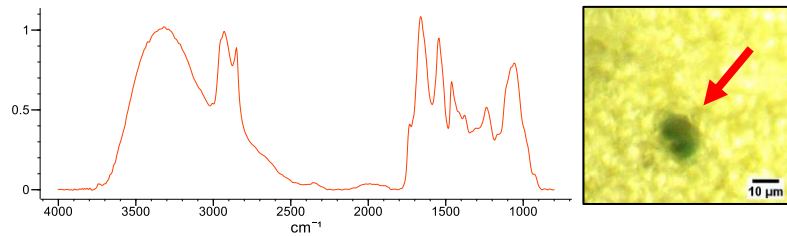

Polypropylene – HQI: 81.0

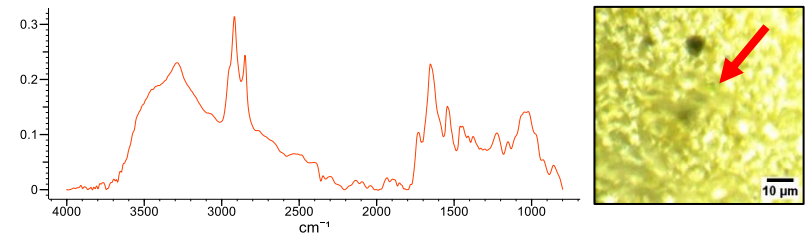

Polyethylene – HQI: 75.1

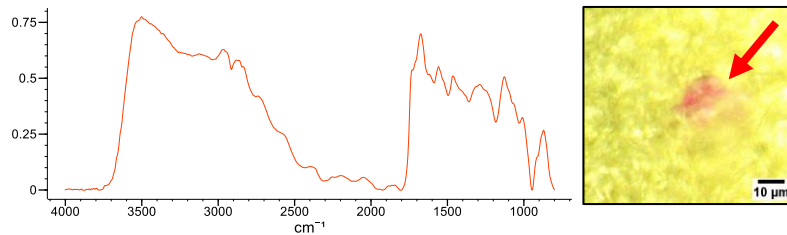

Polypropylene – HQI: 83.4

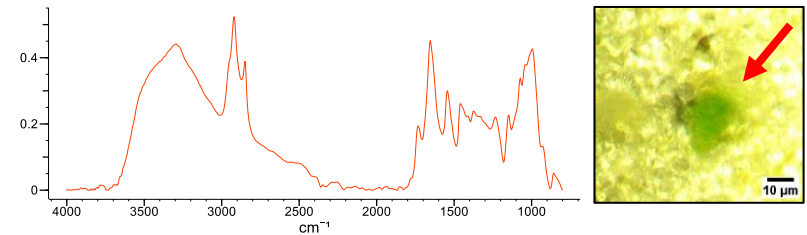

Polypropylene – HQI: 81.8

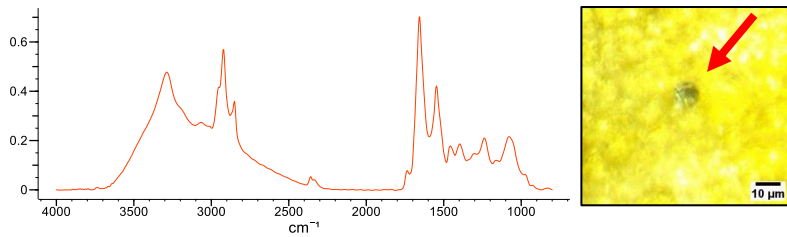

Polyamide – HQI: 79.6

eFIGURE - Microphotographs and  $\mu$ FTIR spectra of the microplastics found in the digested olfactory bulb. Bar scale – 10  $\mu$ m. HQI = hit quality index value.
