# Supplementary material for: Microplastics in the Olfactory Bulb of the Human Brain
Source: PubMed Central journal article supplement (PMC11406405; doi:10.1001/jamanetworkopen.2024.40018), 2024-09-16
Supplement: jamanetwopen-e2440018-s002.pdf [file jamanetwopen-e2440018-s002.pdf]

## Data Sharing Statement

Amato-Lourenço. Microplastics in the Olfactory Bulb of the Human Brain. *JAMA Netw Open*. Published September 16, 2024. doi:10.1001/jamanetworkopen.2024.40018

### Data

**Data available:** Yes

**Data types:** Participant data with identifiers, Data (not involving human participants)

**How to access data:** Data or materials can be obtained from the corresponding author upon request

**When available:** With publication

### Supporting Documents

**Document types:** Informed consent form

**How to access documents:** Data or materials can be obtained from the corresponding author upon request

**When available:** With publication

### Additional Information

**Who can access the data:** researchers whose proposed use of the data has been approved

**Types of analyses:** any purpose

**Mechanisms of data availability:** after approval of a proposal
